# Supplementary material for: Tumor-neuroglia interaction promotes pancreatic cancer metastasis
Source: PubMed Central journal article supplement (PMC7163446; doi:10.7150/thno.42440), 2020-04-06
Supplement: thnov10p5029s1.pdf [file thnov10p5029s1.pdf]

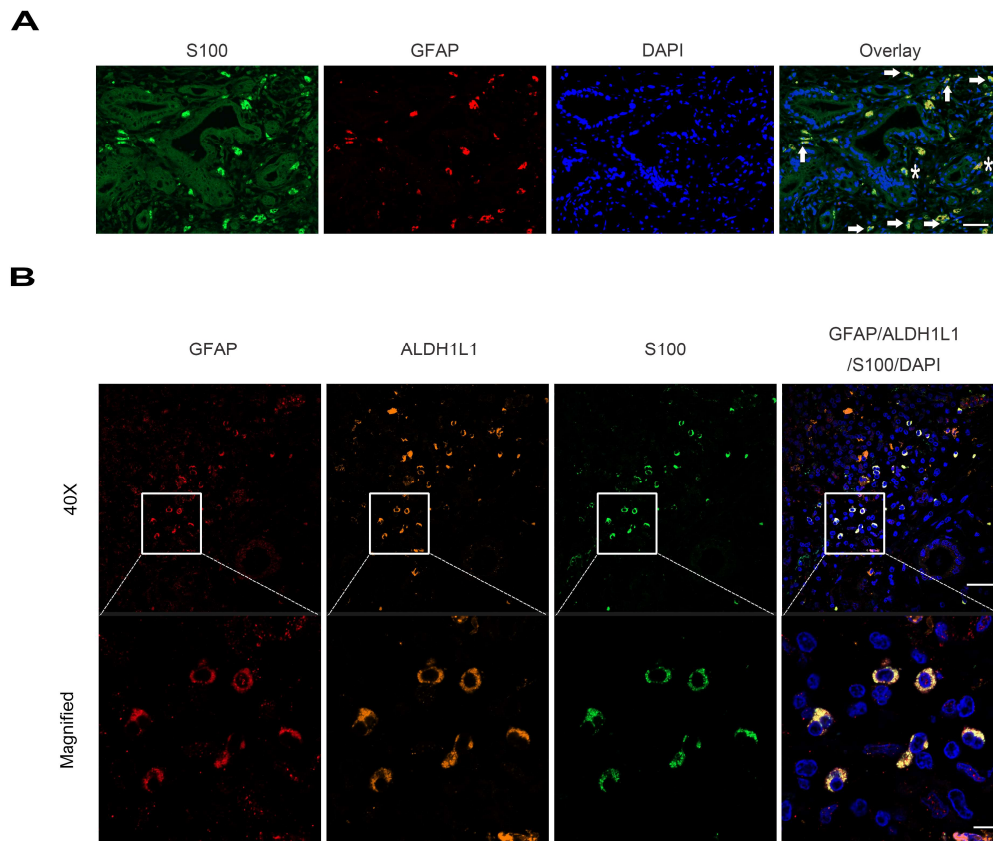

**Figure S1. Schwann cells are located in PDAC stroma and directly contact with epithelial cells.**

- A. Representative double immunolabeling fluorescent images showing that Schwann cells are present in PDAC tissues. Schwann cells were found to be distributed in the PDAC stroma (white arrows). A subset of SCs were observed to closely contact with cancer cells (white asterisks). Scale bar: 50  $\mu\text{m}$ .
- B. PDAC tissue sections were immunolabeled with GFAP (red), ALDH1L1 (orange), S100 (green), and DAPI (blue). Images were acquired using a confocal microscope, demonstrating that cells detected via these markers were highly overlapped. Scale bar: 40  $\times$ ; 50  $\mu\text{m}$ , Magnified view; 10  $\mu\text{m}$ .

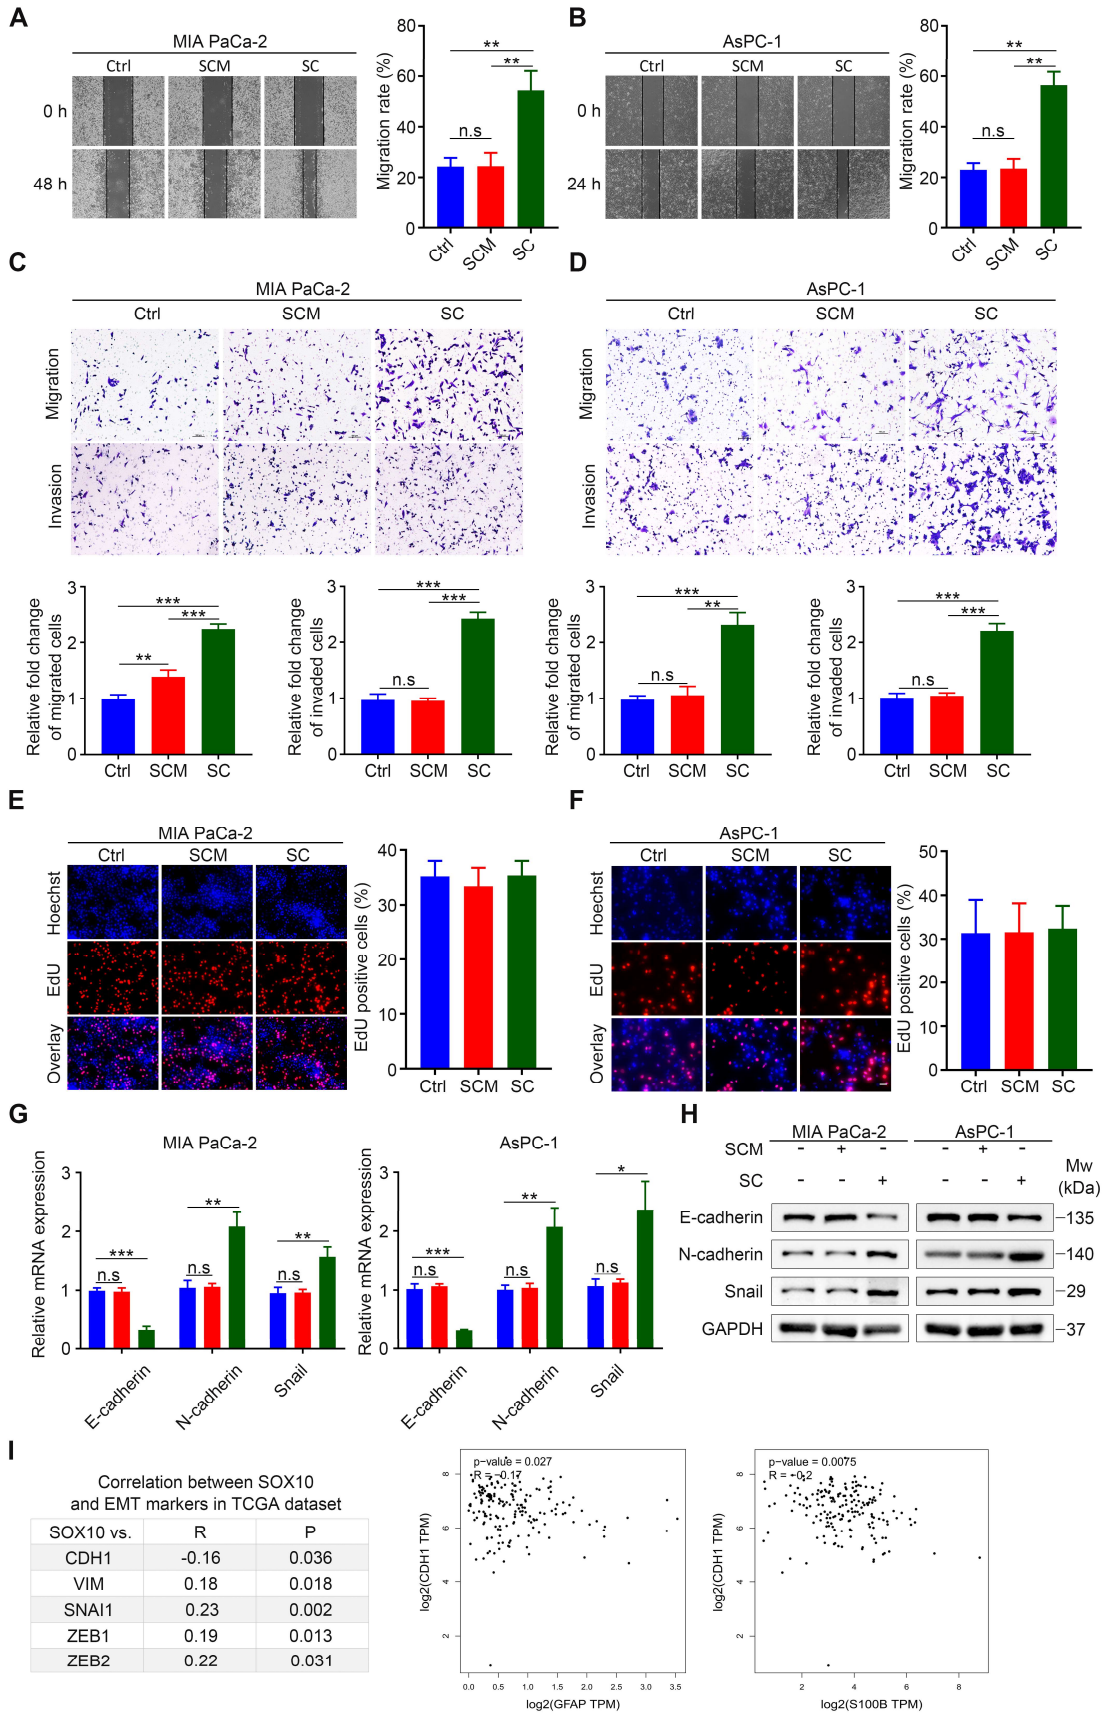

**Figure S2. Schwann cells increase the invasiveness of pancreatic cells and induce EMT *in vitro*.** **A and B.** Representative images of a wound healing assay showing that rat SCs co-culture enhances the migration of MIA PaCa-2 and AsPC-1 cells, while rat Schwann cells conditioned medium (SCM) has no effect on the cell motility of MIA PaCa-2 and AsPC-1 cells. Medium supplemented with 1% FBS was used as a control. **C and D.** Representative images of Transwell migration and invasion assay showing that rat SCs co-culture enhances the migration and invasion of MIA PaCa-2 and AsPC-1 cells, whereas rat SCM has no such effects on MIA PaCa-2 and AsPC-1 cells. Medium containing 1% FBS was used as a control. Scale bar: 100  $\mu\text{m}$ . **E and F.** Representative images of EdU proliferation assay showing neither rat SC co-culture nor rat SCM affected the proliferation of MIA PaCa-2 and AsPC-1 cells *in vitro*. Scale bar: 50  $\mu\text{m}$ . **G.** qRT-PCR analyses showing that only rat SC co-culture could downregulate E-cadherin and upregulate the expression of N-cadherin and the epithelial-mesenchyme transition (EMT) regulator Snail simultaneously, indicating EMT of pancreatic cancer cells after co-cultivation with rat SCs. Cancer cells were cultured in control medium (3% FBS/DMEM) or 70% rat SCM or co-cultured with rat SCs for 24 h **H.** Immunoblotting analysis of E-cadherin, N-cadherin, and Snail levels in response to rat SCM incubation or rat SCs co-culture for 48 h. Cells cultured in control medium were used as a control. Loading control: GAPDH. **I.** Correlations between three Schwann cells markers (GFAP, S100, and SOX10) and EMT markers (CDH1, VIM, SNAI1, ZEB1, and ZEB2) in PDAC were acquired using the publicly available GEPIA tool. \* $p < 0.05$ , \*\* $p < 0.01$ , \*\*\* $p < 0.001$ .

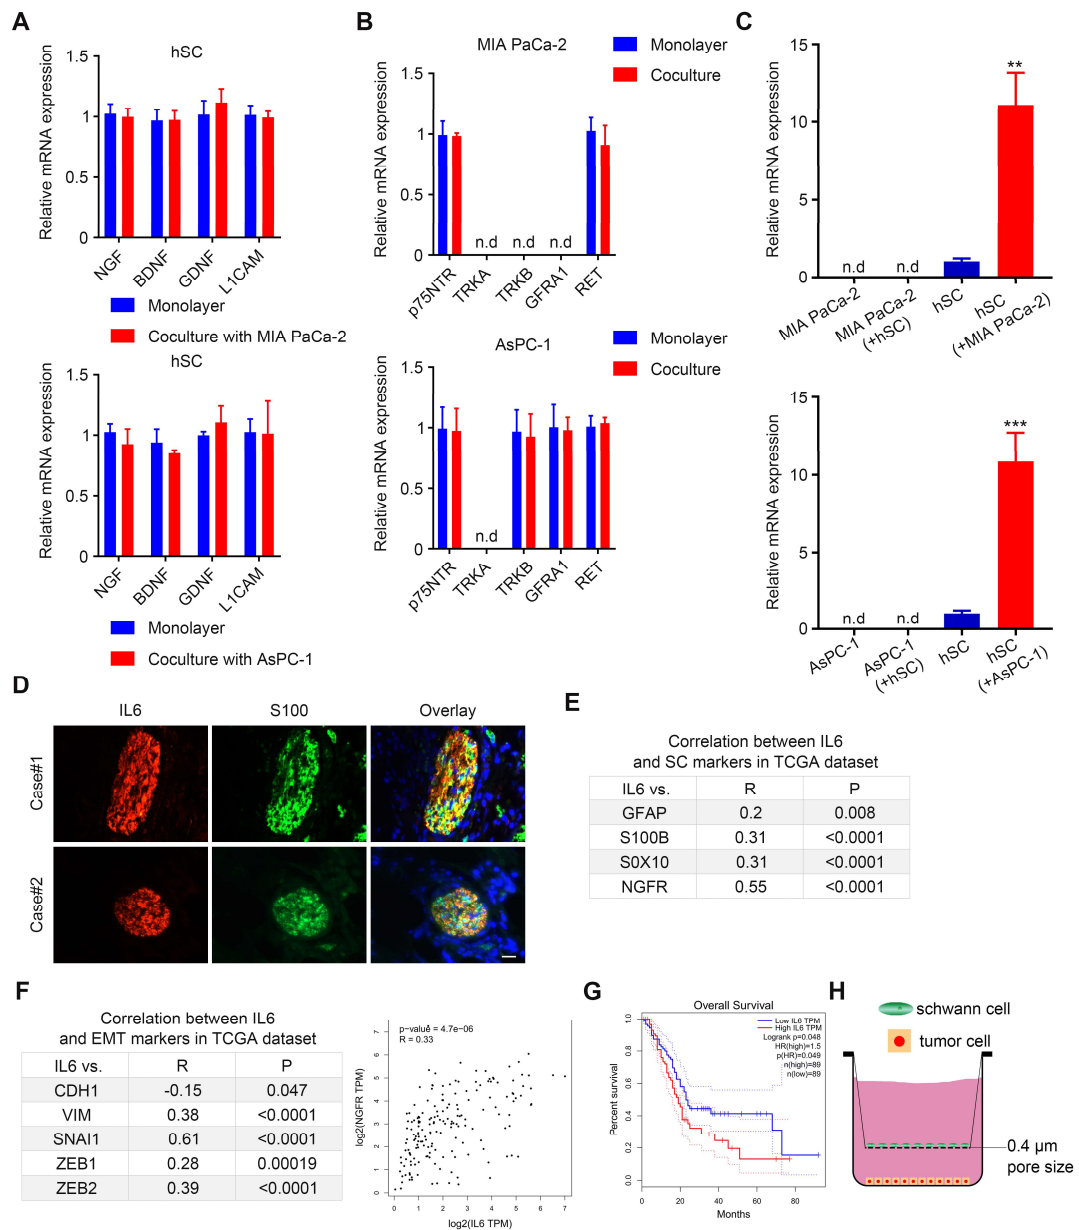

**Figure S3. Schwann cells secrete IL6 to promote pancreatic cell migration, invasion, and Epithelial-Mesenchymal transition *in vitro*.** **A.** QRT-PCR analysis of neurotrophic factors *NGF*, *BDNF*, *GDNF*, and *L1CAM* in human SCs cultured in monolayers or co-cultured with pancreatic cancer cells. **B.** The expression of corresponding receptors in pancreatic cancer cells (*p75NTR*, *TRKA*, *TRKB*, *GFRA1*, and *RET*) cultured in monolayers or co-cultured with human SCs was assessed using qRT-PCR. **C.** QRT-PCR analysis of *IL6* mRNA level in SCs and pancreatic cancer cells (MIA PaCa-2 and AsPC-1) either cultured in monolayers or co-cultured with each other. **D.** Double immunolabeling fluorescent images showing intensive IL6 staining in S100-positive SCs in PDAC samples. Scale bar, 20  $\mu$ m. **E.** Correlations between the gene expression of *IL6* and SC markers (*GFAP*, *S100B*, *SOX10*, *NGFR*) in PDAC were obtained using the publicly accessible cBioportal tool (TCGA PanCancer Atlas). **F.** Left chart: correlations between IL6 and EMT

markers (CDH1, VIM, SNAI1, ZEB1, and ZEB2) in PDAC were obtained using the publicly available GEPIA tool. Right chart: correlation between IL6 and SCs markers (NGFR) was analyzed using the publicly accessible GEPIA tool. **G.** Kaplan–Meier survival analysis was performed by comparing IL6-high pancreatic cancers (n = 89) and IL6-low pancreatic cancers (n = 89) using the GEPIA tool. **H.** Schematic illustration of the co-culture system. \*p < 0.05, \*\*p < 0.01, \*\*\*p < 0.001.

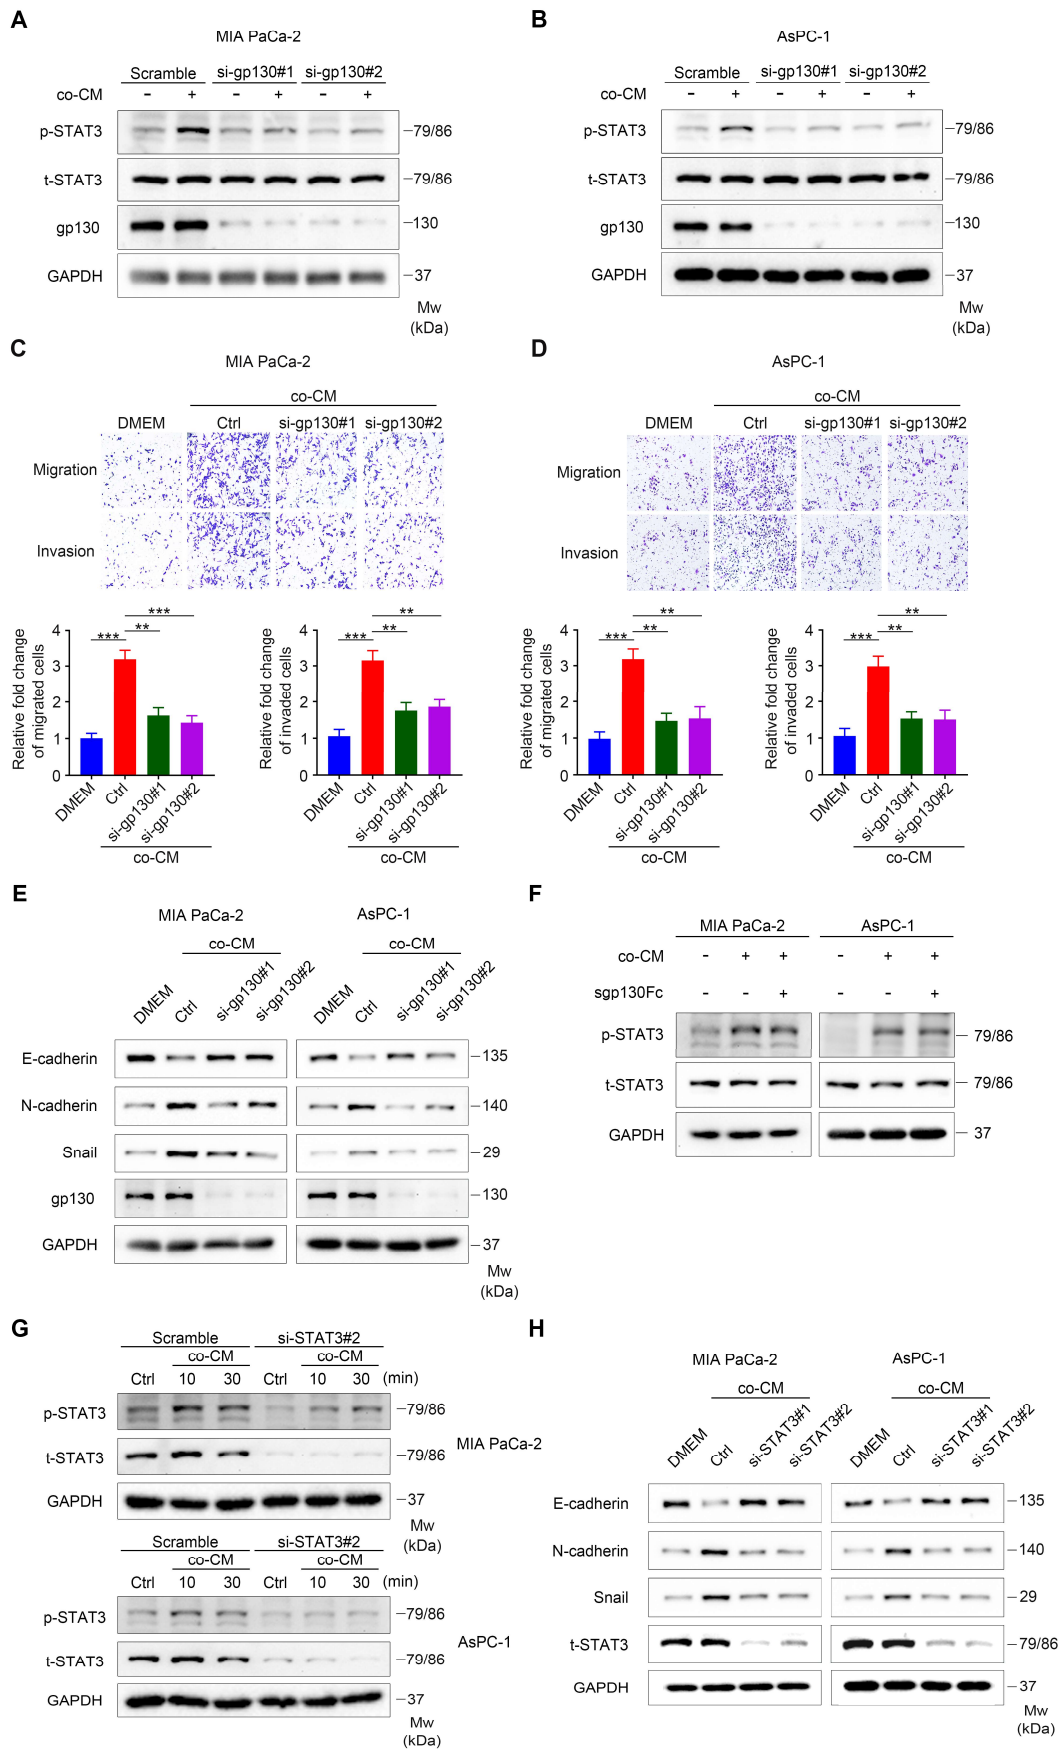

**Figure S4. STAT3 signaling is critical for SC-induced pancreatic cancer cell migration and**

**invasion.**

**A and B.** Scrambled siRNA or two gp130-specific siRNAs transfected MIA PaCa-2 or AsPC-1 cells were incubated in the absence or presence of co-CM for 30 min, after which cells were lysed with lysis buffer to detect STAT3 activation using immunoblotting. Loading control: GAPDH. **C and D.** Representative images of Transwell assays showing that in comparison with Scrambled siRNA-transfected MIA PaCa-2 or AsPC-1 cells, gp130-specific siRNAs-transfected tumor cells exhibited impaired pancreatic cancer cells locomotion and invasion. Control siRNA-transfected tumor cells incubated with 1% FBS/DMEM were used as a control. **E.** Scrambled siRNA or two gp130-specific siRNAs transfected MIA PaCa-2 or AsPC-1 cells were cultured in 70% co-CM (co-CM:10% FBS/DMEM) for 48 h, after which the cells were lysed for immunoblotting analysis. Scrambled siRNA-transfected cells grown in control medium (3% FBS/DMEM) were used as a control. Loading control: GAPDH. **F.** Cells were exposed to FBS-free medium, co-CM or co-CM plus 10  $\mu\text{g/ml}$  sgp130Fc for 30 min and then collected for immunoblotting analysis. Loading control: GAPDH. **G.** Immunoblotting analysis showing disrupted STAT3 activation in MIA PaCa-2 or AsPC-1 cells following co-CM incubation at the indicated times in STAT3 siRNA#2-transfected MIA PaCa-2 or AsPC-1 cells. Scrambled siRNA-transfected MIA PaCa-2 or AsPC-1 cells exposed to co-CM were used as a control. Loading control: GAPDH. **H.** Immunoblotting analysis showing that STAT3 downregulation remarkably impaired co-CM induced EMT process of pancreatic cancer cells. Loading control: GAPDH.

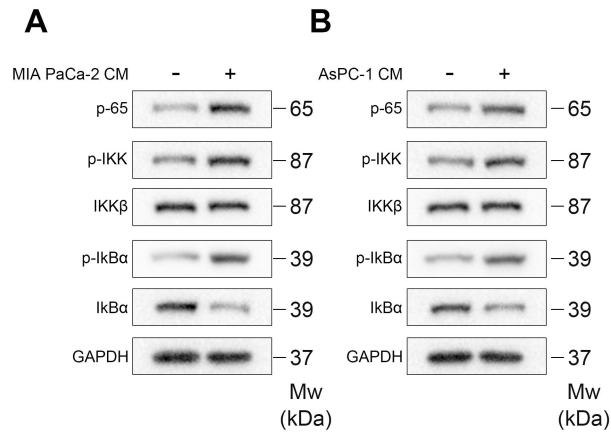

**Fig S5. TCM treatment resulted in canonical NF- $\kappa$ B pathway activation.**

- A.** Western blotting results showing activation of p65 in SCs upon addition of TCM derived from MIA PaCa-2 cells, as shown by the increased level of phospho-p65, paralleled to phosphorylation of IKK and IkB $\alpha$ , which was followed by its degradation. Loading control: GAPDH.
- B.** Western blotting results showing that activation of p65 in SCs upon addition of TCM derived from AsPC-1 cells, as shown by increased level of phospho-p65, paralleled to phosphorylation of IKK and IkB $\alpha$ , which was followed by its degradation. Loading control: GAPDH.



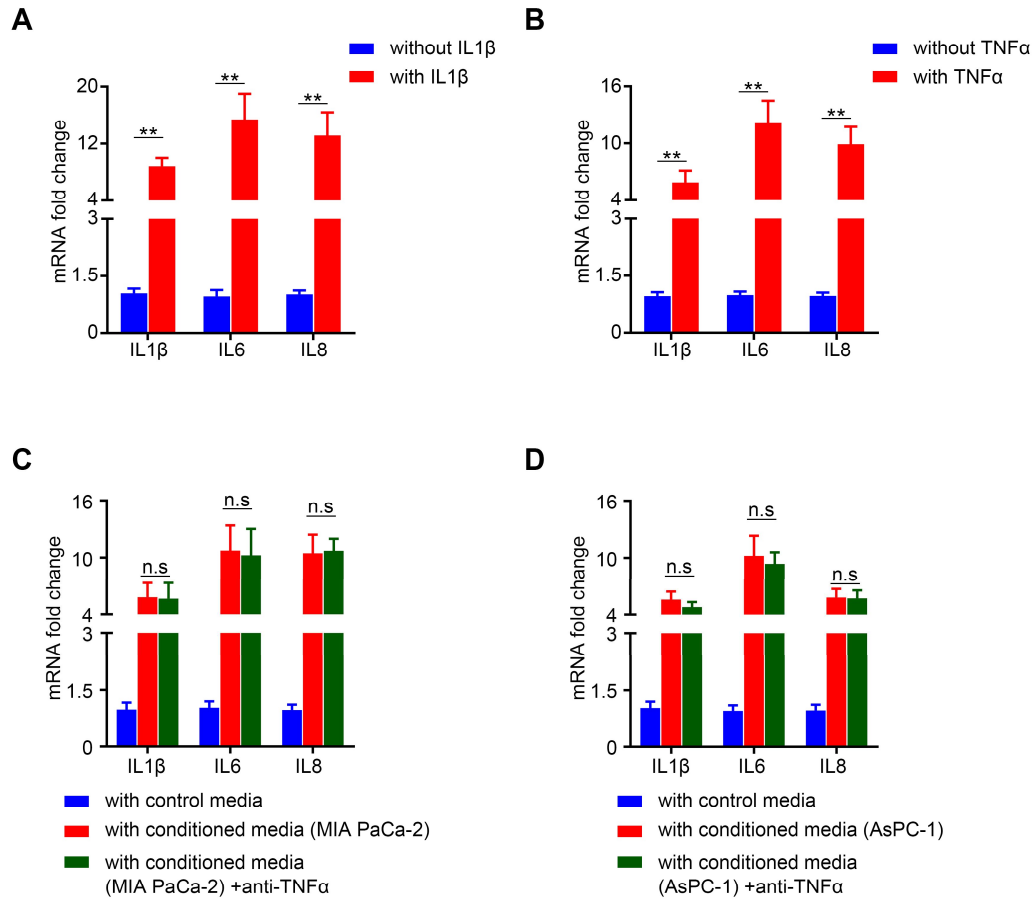

**Fig S6. TNF $\alpha$  derived from pancreatic cells is not responsible for upregulated pro-inflammatory cytokines production from SCs.**

- Human Schwann cells were cultured in the absence or presence of 5 ng/ml recombinant human IL1 $\beta$  for 24 h, after which total RNA was extracted and subjected to qRT-PCR analysis.
- Human Schwann cells were cultured without or with 10 ng/ml recombinant human TNF $\alpha$  for 24 h, after which total RNA was extracted and subjected to qRT-PCR analysis.
- QRT-PCR analysis of *IL1B*, *IL6*, and *IL8* mRNA levels in human SCs cultured in control medium or 70% TCM derived from MIA PaCa-2 cells in the absence or presence of 20 ng/ml TNF $\alpha$  neutralizing antibody for 24 h.
- RT-qPCR analysis of *IL1B*, *IL6*, and *IL8* mRNA level in human SCs cultured in control medium or 70% TCM derived from AsPC-1 cells in the absence or presence of 20 ng/ml TNF $\alpha$  neutralizing antibody for 24 h.

**Table S1. Primer sequence for qRT-PCR**

| <b>Gene</b>       | <b>Forward primer (5' to 3')</b> | <b>Reverse primer (5' to 3')</b> |
|-------------------|----------------------------------|----------------------------------|
| <b>E-cadherin</b> | CGAGAGCTACACGTTACGG              | GGGTGTCGAGGGAAAAATAGG            |
| <b>N-cadherin</b> | AGCCAACCTTAACTGAGGAGT            | GGCAAGTTGATTGGAGGGATG            |
| <b>Snail</b>      | TCTTTCCTCGTCAGGAAGC              | AGGTAAACTCTGGATTAGAGTCC          |
| <b>TNF</b>        | GAGGCCAAGCCCTGGTATG              | CGGGCCGATTGATCTCAGC              |
| <b>IL1A</b>       | TGGTAGTAGCAACCAACGGGA            | ACTTTGATTGAGGGCGTCATTC           |
| <b>IL1B</b>       | ACGATGCACCTGTACGATCA             | TCTTTCAACACGCAGGACAG             |
| <b>IL6</b>        | ACTCACCTCTTCAGAACGAATTG          | CCATCTTTGGAAGGTTTCAGGTTG         |
| <b>CXCL8</b>      | ACTGAGAGTGATTGAGAGTGGAC          | AACCCTCTGCACCCAGTTTTTC           |
| <b>LIF</b>        | CCAACGTGACGGACTTCCC              | TACACGACTATGCGGTACAGC            |
| <b>CCL2</b>       | CAGCCAGATGCAATCAATGCC            | TGGAATCCTGAACCCACTTCT            |
| <b>IL1R1</b>      | ATGAAATTGATGTTTCGTCCCTGT         | ACCACGCAATAGTAATGTCCTG           |
| <b>IL6R</b>       | CCCCTCAGCAATGTTGTTTGT            | CTCCGGGACTGCTAACTGG              |
| <b>GP130</b>      | CGGACAGCTTGAACAGAATGT            | ACCATCCCCTCACACCTCA              |
| <b>CXCR1</b>      | GGCCGGTGCTTCAGTTAGAT             | GGGCATAGGCGATGATCACA             |
| <b>CXCR2</b>      | CCTGTCTTACTTTTCCGAAGGAC          | TTGCTGTATTGTTGCCCATGT            |
| <b>NGF</b>        | TGTGGGTTGGGGATAAGACCA            | GCTGTCAACGGGATTTGGGT             |
| <b>BDNF</b>       | ATTGGCTGGCGATTCATAAG             | GTTTCCCTTCTGGTCATGGA             |
| <b>GDNF</b>       | TGACTCCAATATGCCTGAAGATTATC       | AATGGTGGCTTGAATAAAATCCA          |
| <b>L1CAM</b>      | TGTCATCACGGAACAGTCTCC            | CTGGCAAAGCAGCGGTAGAT             |
| <b>p75NTR</b>     | CCGTTGGATTACACGGTCCAC            | TGAAGGCTATGTAGGCCACAA            |
| <b>TRKA</b>       | AACCTCACCATCGTGAAGAGT            | TGAAGGAGAGATTCAGGCGAC            |
| <b>TRKB</b>       | TCGTGGCATTTCGAGATTGG             | TCGTCAGTTTGTTCGGGTAAA            |
| <b>GFRA1</b>      | CCAAGCACAGCTACGGAATG             | CAGGCACGATGGTCTGTCTG             |
| <b>RET</b>        | ACACGGCTGCATGAGAACAA             | GCCCTCACGAAGGGATGTG              |
| <b>GAPDH</b>      | GCTAAGCAGTTGGTGGTGCA             | TCACCACCATGGAGAAGGC              |

**Table S2. siRNA sequences for cell transfection**

| <b>Gene</b>             | <b>Sense (5'→3')</b>         | <b>Antisense (5'→3')</b>    |
|-------------------------|------------------------------|-----------------------------|
| <b>Negative control</b> | 5'-UUCUCCGAACGUGUCACGUTT-3'  | 5'-ACGUGACACGUUCGGAGAATT-3' |
| <b>siSTAT3#1</b>        | 5'-CCCGUCAACAAAUUAAGAATT-3'  | 5'-UUCUAAUUUUGUUGACGGGTT-3' |
| <b>siSTAT3#2</b>        | 5'-GCAACAGAUUGCCUGCAUUTT-3'  | 5'-AAUGCAGGCAAUCUGUUGCTT-3' |
| <b>siIL1R1#1</b>        | 5'-GGAAAGACCUAUGACGCAUTT-3'  | 5'-AUGCGUCAUAGGUCUUUCCTT-3' |
| <b>siIL1R1#2</b>        | 5'-CCUCAUCACAGUGCUUAAUTT-3'  | 5'-AUUAAGCACUGUGAUGAGGTT-3' |
| <b>siIL1B#1</b>         | 5'-GCCAGGAUUAUAACUGACUUTT-3' | 5'-AAGUCAGUUAUAUCCUGGCTT-3' |
| <b>siIL1B#2</b>         | 5'-GGUGAUGUCUGGUCCAUAUTT-3'  | 5'-AUAUGGACCAGACAUCACCTT-3' |
| <b>siGP130#1</b>        | 5'-GCAUCCAGUGUCACCUUUATT-3'  | 5'-UAAAGGUGACACUGGAUGCTT-3' |
| <b>siGP130#2</b>        | 5'-GCACCAAGUUUCUGGUUAUATT-3' | 5'-UAUACCAGAAACUUGGUGCTT-3' |

**Table S3. Primary and secondary antibodies**

| <b>Antibody</b>                                                           | <b>Species</b> | <b>Type</b> | <b>Dilution</b>         | <b>Source</b>  |
|---------------------------------------------------------------------------|----------------|-------------|-------------------------|----------------|
| <b>GFAP</b>                                                               | Rabbit         | Polyclonal  | 1:400 (IF)              | Dako           |
| <b>GFAP</b>                                                               | Goat           | Polyclonal  | 1:100 (IF)              | Abcam          |
| <b>S100</b>                                                               | Mouse          | Monoclonal  | 1:500 (IHC),1:50 (IF)   | Abcam          |
| <b>S100</b>                                                               | Rabbit         | Monoclonal  | 1:100 (IF)              | Abcam          |
| <b>ALDH1L1</b>                                                            | Mouse          | Monoclonal  | 1:40 (IF)               | Abcam          |
| <b>E-cadherin</b>                                                         | Mouse          | Monoclonal  | 1:1000 (WB)             | Cell Signaling |
| <b>N-cadherin</b>                                                         | Rabbit         | Monoclonal  | 1:1000 (WB)             | Cell Signaling |
| <b>Snail</b>                                                              | Rabbit         | Monoclonal  | 1:1000 (WB)             | Cell Signaling |
| <b>GAPDH</b>                                                              | Mouse          | Monoclonal  | 1:5000 (WB)             | Ray Antibody   |
| <b>IL1R1</b>                                                              | Rabbit         | Polyclonal  | 1:1000 (WB)             | Abcam          |
| <b>phospho-STAT3</b>                                                      | Rabbit         | Monoclonal  | 1:2000 (WB), IF (1:100) | Cell Signaling |
| <b>t-STAT3</b>                                                            | Mouse          | Monoclonal  | 1:1000 (WB)             | Cell Signaling |
| <b>gp130</b>                                                              | Rabbit         | Monoclonal  | 1:1000 (WB)             | Cell Signaling |
| <b>phospho-NF-<math>\kappa</math>B/p65<br/>(Ser536)</b>                   | Rabbit         | Monoclonal  | 1:1000 (WB)             | Cell Signaling |
| <b>NF-<math>\kappa</math>B/p65</b>                                        | Rabbit         | Monoclonal  | 1:1000 (WB)             | Cell Signaling |
| <b>Phospho-IKK<math>\alpha</math>/<math>\beta</math><br/>(Ser176/180)</b> | Rabbit         | Monoclonal  | 1:1000 (WB)             | Cell Signaling |
| <b>IKK<math>\beta</math></b>                                              | Rabbit         | Monoclonal  | 1:1000 (WB)             | Cell Signaling |
| <b>I<math>\kappa</math>B<math>\alpha</math></b>                           | Mouse          | Monoclonal  | 1:1000 (WB)             | Cell Signaling |
| <b>Phospho-I<math>\kappa</math>B<math>\alpha</math> (Ser32)</b>           | Rabbit         | Monoclonal  | 1:1000 (WB)             | Cell Signaling |
| <b>Phosphor-NF-<math>\kappa</math>B/p65<br/>(S536)</b>                    | Rabbit         | Polyclonal  | 1:100 (IHC)             | Abcam          |
| <b>IL6</b>                                                                | Rabbit         | Polyclonal  | 1:200 (IHC),1:50 (IF)   | Abcam          |
| <b>Alexa Fluor 555 donkey<br/>anti-rabbit IgG</b>                         | Donkey         | Polyclonal  | 1:300 (IF)              | Abcam          |
| <b>Alexa Fluor 488 donkey<br/>anti-mouse IgG</b>                          | Donkey         | Polyclonal  | 1:300 (IF)              | Abcam          |
| <b>Alexa Fluor 647 donkey<br/>anti-goat IgG</b>                           | Donkey         | Polyclonal  | 1:300 (IF)              | Abcam          |

IF, immunofluorescence; IHC, immunohistochemistry; WB, Western blotting.
